# Supplementary figures and images for: Molecular dynamic simulation for thermal decomposition of RDX with nano-AlH3 particles
Source: Royal Society of Chemistry journal article supplement (doi:10.1039/c8cp01621f), 2018-01-01

### Training set of Bonding:

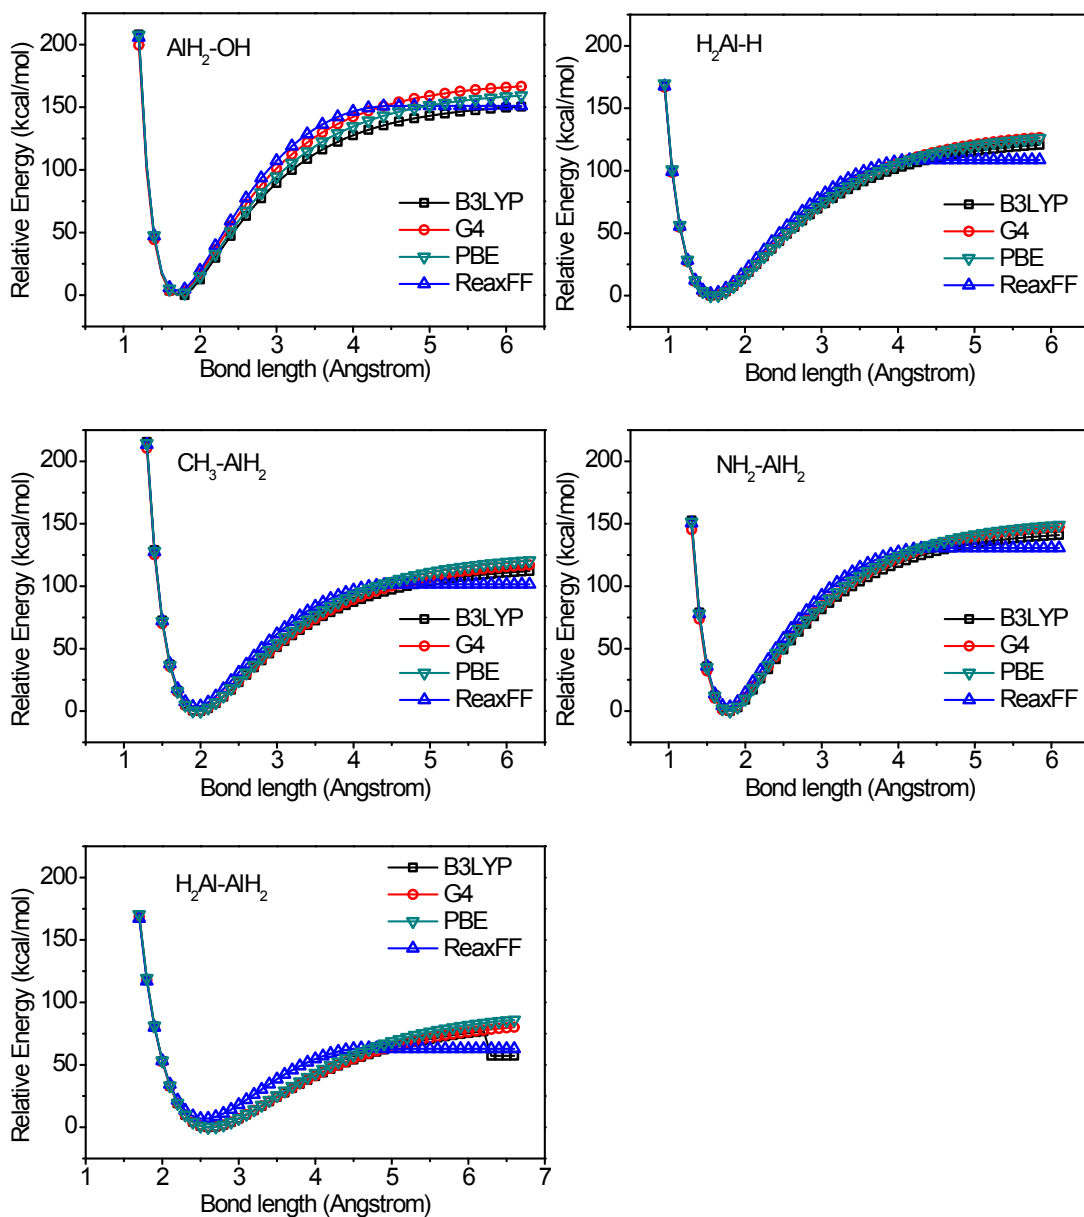

### Training set of bond angle:

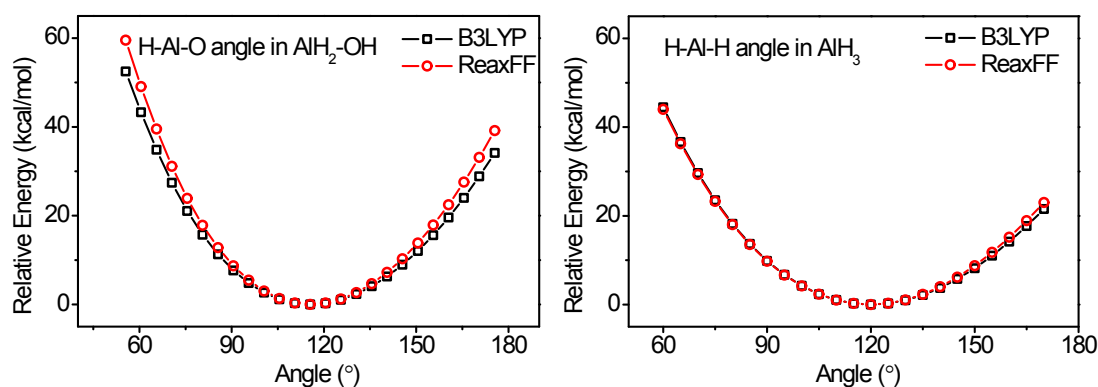

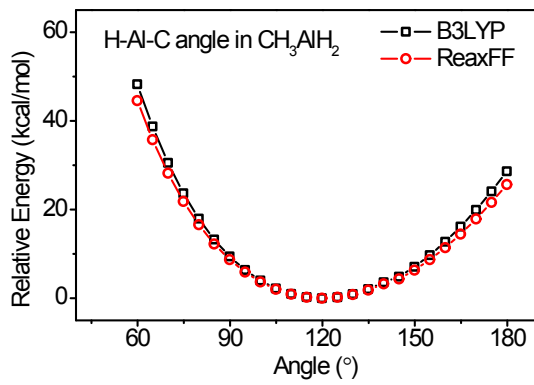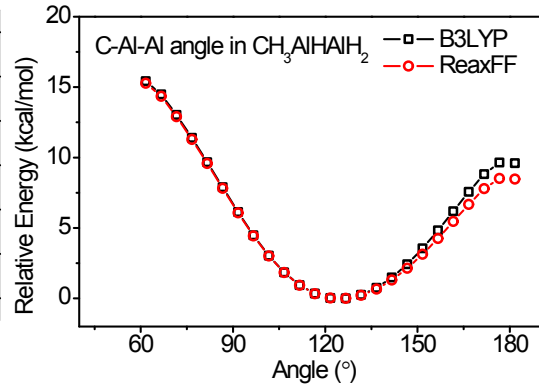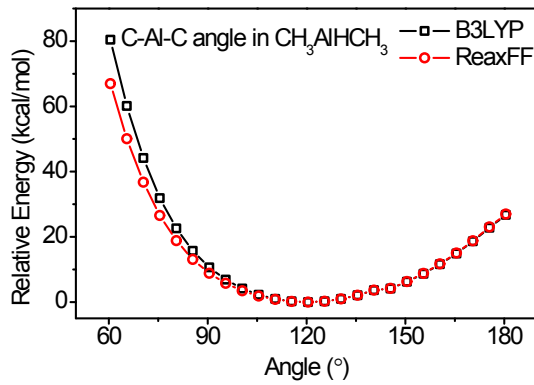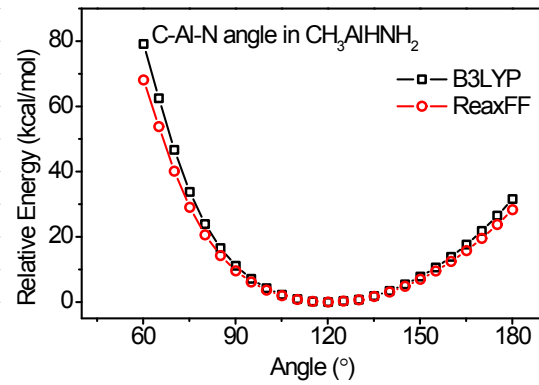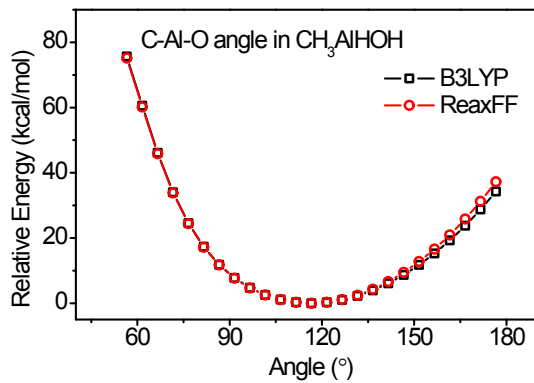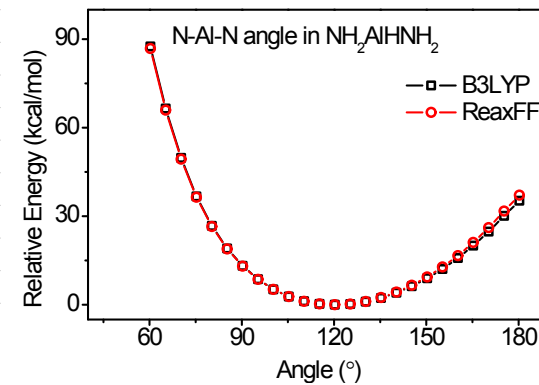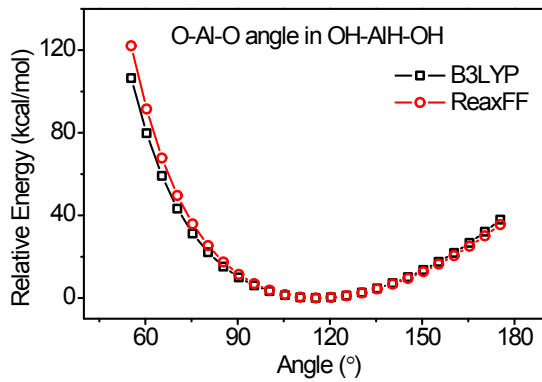

Supplement: c8cp01621f1.pdf [file c8cp01621f1.pdf]
